# Supplementary material
Source: PubMed Central journal article supplement (PMC4635650)

**Figure S1. Lineage-specific divergence of the X and Y chromosomes.** The X chromosome, Y chromosome, and autosomes of *G. aculeatus* were aligned to the ninespine stickleback (*P. pungitius*) to quantify  $d_N/d_S$  ratios between the sex chromosomes and *P. pungitius* orthologs (autosomes, N = 27,328 genes; PAR, N = 87 genes; stratum two, N = 471 genes; stratum two n.f., N = 91 genes; stratum one, N = 74 genes). Non-functional (n.f.) genes are those that include frameshifts or nonsense mutations on the Y chromosome. Significant differences among groups were determined using a Kruskal-Wallis test. Groups significantly different from the autosomes using a post-hoc Mann-Whitney U test (corrected for multiple comparisons) are indicated with asterisks (\*\*  $P < 0.05$ ). Whiskers are 1.5x the interquartile range. Sample sizes are the same as in Figure 2. Outliers are not shown.

Figure S1

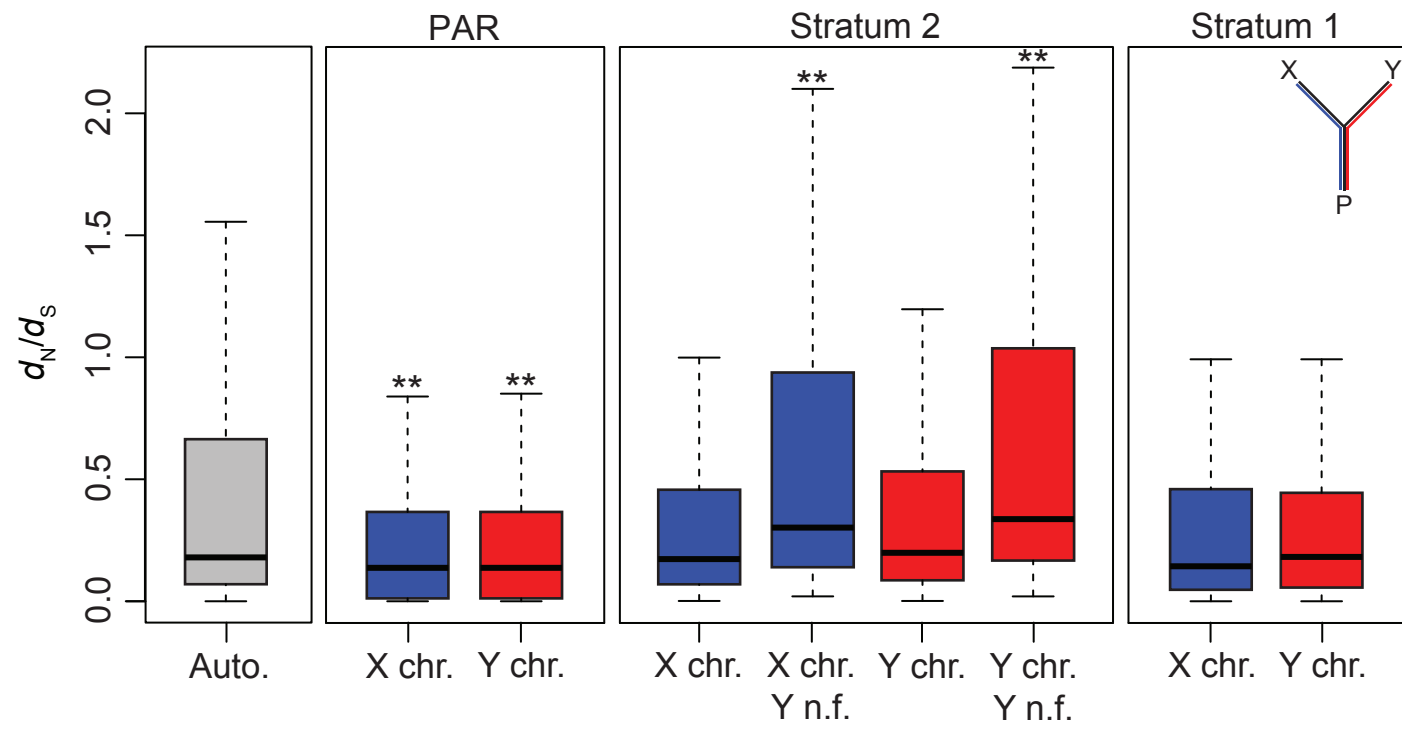

Supplement: supp_msv078_FigureS1Combined.pdf [file supp_msv078_FigureS1Combined.pdf]
